# Supplementary material for: Predicting Growth Conditions from Internal Metabolic Fluxes in an In-Silico Model of E. coli
Source: PLoS One. 2014 Dec 12;9(12):e114608. doi: 10.1371/journal.pone.0114608 (PMC4264753; doi:10.1371/journal.pone.0114608)
Supplement: S1 Table — Key reactions identified to discriminate carbon sources. These reactions were identified from a model trained to only predict carbon sources (separate prediction). The model was trained on a data set obtained with 1 C/N impurity and with training data-set size of ∼2450 observations. (XLSX) [file pone.0114608.s004.xlsx]

## Sheet: Sheet1
'Carbon Source is D-Glucose'	'Carbon Source is Pyruvate'	'Carbon Source is Glycerol'	'Carbon Source is Acetate'	'Carbon Source is D-ribose'	'Carbon Source is D-fructose'	'Carbon Source is D-sorbitol'
'glucose 6-phosphate dehydrogenase'	' 4-aminobutyrate transaminase'	'glycerol-3-phosphate dehydrogenase (NADP)'	' 2',3'-cyclic-nucleotide phosphodiesterase (UMP) (periplasm)'	'acyl-CoA dehydrogenase (butanoyl-CoA)'	'acetylglutamate kinase'	'glycerol-3-phosphatase'
'glucose-6-phosphate isomerase'	'acyl-CoA dehydrogenase (decanoyl-CoA)'	'Glycerol dehydrogenase'	'acyl-[acyl-carrier-protein] synthetase (n-C14:1)'	'acyl-CoA dehydrogenase (hexanoyl-CoA)'	'N-acetylglutamate synthase'	'lactaldehyde dehydrogenase'
' 6-phosphogluconolactonase'	'acyl-CoA dehydrogenase (dodecanoyl-CoA)'	'glycerol kinase'	'ATP synthase (four protons for one ATP) (periplasm)'	'acyl-CoA dehydrogenase (octanoyl-CoA)'	'N-acetyl-g-glutamyl-phosphate reductase'	'L-Lactate dehydrogenase (ubiquinone)'
	'L-aspartase'		'Carbamate kinase'	' 3-hydroxyacyl-CoA dehydratase (3-hydroxybutanoyl-CoA)'	'ATP synthase (four protons for one ATP) (periplasm)'	'sorbitol-6-phosphate dehydrogenase'
	'aspartate transaminase'		'CTP synthase (glutamine)'	' 3-hydroxyacyl-CoA dehydratase (3-hydroxyhexanoyl-CoA)'	'Carbamate kinase'
	'citrate synthase'		'cytochrome oxidase bo3 (ubiquinol-8: 4 protons) (periplasm)'	' 3-hydroxyacyl-CoA dehydratase (3-hydroxyoctanoyl-CoA)'	'CTP synthase (glutamine)'
	'Cysteine Desulfhydrase'		'cytidine deaminase'	' 3-hydroxyacyl-CoA dehydrogenase (acetoacetyl-CoA)'	'Dihydroxyacetone phosphotransferase'
	'cytochrome oxidase bo3 (ubiquinol-8: 4 protons) (periplasm)'		'fatty-acid-CoA thioesterase (tetradecenoate)'	' 3-hydroxyacyl-CoA dehydrogenase (3-oxohexanoyl-CoA)'	'fructose-1-phosphate kinase'
	' 3-hydroxyacyl-CoA dehydratase (3-hydroxydecanoyl-CoA)'		'fumarase'	'ribokinase'	'glycerol-3-phosphate dehydrogenase (ubiquinone-8)'
	' 3-hydroxyacyl-CoA dehydratase (3-hydroxydodecanoyl-CoA)'		'glycerate kinase'		'glycine C-acetyltransferase'
	'fructose-bisphosphatase'		'Glycolate oxidase'		'glucose-6-phosphate isomerase'
	'glucose 6-phosphate dehydrogenase'		'malate synthase'		'triose-phosphate isomerase'
	'glutamate dehydrogenase (NADP)'		'malic enzyme (NAD)'
	'Glycolate oxidase'		'pyruvate dehydrogenase'
	' 3-hydroxyacyl-CoA dehydrogenase (3-oxodecanoyl-CoA)'		'pyruvate formate lyase'
	' 3-hydroxyacyl-CoA dehydrogenase (3-oxododecanoyl-CoA)'		'pyrimidine-nucleoside phosphorylase (uracil)'
	'hypoxanthine dehydrogenase'		'L-serine via sodium symport (periplasm)'
	' 3-ketoacyl-CoA thiolase'		'succinate-semialdehyde dehydrogenase (NAD)'
	' 3-ketoacyl-CoA thiolase'
	'pyruvate dehydrogenase'
	' 6-phosphogluconolactonase'
	'phosphoenolpyruvate synthase'
	'triose-phosphate isomerase'
