# Supplementary material for: Predicting Growth Conditions from Internal Metabolic Fluxes in an In-Silico Model of E. coli
Source: PLoS One. 2014 Dec 12;9(12):e114608. doi: 10.1371/journal.pone.0114608 (PMC4264753; doi:10.1371/journal.pone.0114608)
Supplement: S2 Table — Key reactions identified to discriminate nitrogen sources. These reactions were identified from a model trained to only predict carbon sources (separate prediction). The model was trained on a data set obtained with 1 C/N impurity and with training data-set size of ∼2450 observations. (XLSX) [file pone.0114608.s005.xlsx]

## Sheet: Sheet1
'Nitrogen Source is Ammonia'	'Nitrogen Source is Adenine'	'Nitrogen Source is Cytidine'	'Nitrogen Source is Putrescine'	'Nitrogen Source is Glycine'	'Nitrogen Source is L-Alanine'	'Nitrogen Source is L-Glutamine'
'adenine phosphoribosyltransferase'	'adenine deaminase'	'adenosine kinase'	' 4-aminobutyrate transaminase'	'glycine hydroxymethyltransferase, reversible'	' 5'-deoxyadenosine nuclosidase'	'N-Acetyl-D-glucosamine(anhydrous)N-Acetylmuramyl-tripeptide amidase'
' 2-Oxoglutarate dehydrogenase'	'adenine phosphoribosyltransferase'	'aldehyde dehydrogenase (acetaldehyde, NADP)'	'Aminobutyraldehyde dehydrogenase'	'Glycine Cleavage System'	'acetylglutamate kinase'	'L-allo-threonine dehydrogenase'
'alcohol dehydrogenase (ethanol)'	'adenylsuccinate lyase'	'AMP nucleosidase'	'fructose-bisphosphatase'		'N-acetylglutamate synthase'	'Cysteine Desulfhydrase'
'L-aspartase'	'adenylosuccinate synthase'	'aspartate carbamoyltransferase'	'glycerol-3-phosphatase'		'aspartate transaminase'	'glucosamine-1-phosphate N-acetyltransferase'
'aspartate transaminase'	'L-aspartase'	'L-allo-threonine dehydrogenase'	'sodium proton antiporter (H:NA is 1.5) (periplasm)'		'glucose 6-phosphate dehydrogenase'	'glutaminase'
'L-allo-threonine dehydrogenase'	'formyltetrahydrofolate deformylase'	'CTP synthase (glutamine)'	'Putrescine Transaminase'		'glutamine synthetase'	'glycine C-acetyltransferase'
'citrate synthase'	'glutamate dehydrogenase (NADP)'	'Cysteine Desulfhydrase'			'glutamate dehydrogenase (NADP)'	'murein polymerizing transglycosylase'
'fructose-bisphosphatase'	'hypoxanthine dehydrogenase'	'cytidine deaminase'			'malate dehydrogenase'	'phospho-N-acetylmuramoyl-pentapeptide-transferase (meso-2,6-diaminopimelate)'
'glutamate dehydrogenase (NADP)'	' 5'-nucleotidase (dAMP)'	'fructose-bisphosphatase'			'pyruvate formate lyase'	'phosphoglucosamine mutase'
'hydroxypyruvate isomerase'	'purine-nucleoside phosphorylase (Adenosine)'	'formate dehydrogenase (quinone-8) (periplasm)'			'pyruvate oxidase'	'L-allo-Threonine Aldolase'
'Hydroxypyruvate reductase (NADPH)'	'purine-nucleoside phosphorylase (Deoxyadenosine)'	'glycerol-3-phosphate dehydrogenase (ubiquinone-8)'			'phosphoenolpyruvate synthase	'UDP-N-acetylglucosamine diphosphorylase'
'sodium proton antiporter (H:NA is 1.5) (periplasm)'		'hydroxypyruvate isomerase'
'pyruvate formate lyase'		'Hydroxypyruvate reductase (NADPH)'
		'sodium proton antiporter (H:NA is 1.5) (periplasm)'
		' 5'-nucleotidase (AMP)'
		' 2-Octaprenylphenol hydroxylase (anaerobic)'
		'pyrimidine-nucleoside phosphorylase (uracil)'
		'tartronate semialdehyde reductase'
